# Supplementary material
Source: Springer Nature journal article supplement (https://www.springermedizin.de/resource/supplementary/13058_2009_2431_MOESM2_ESM.pdf/9701400)

Age-adjusted incidence rate per 100,000 women

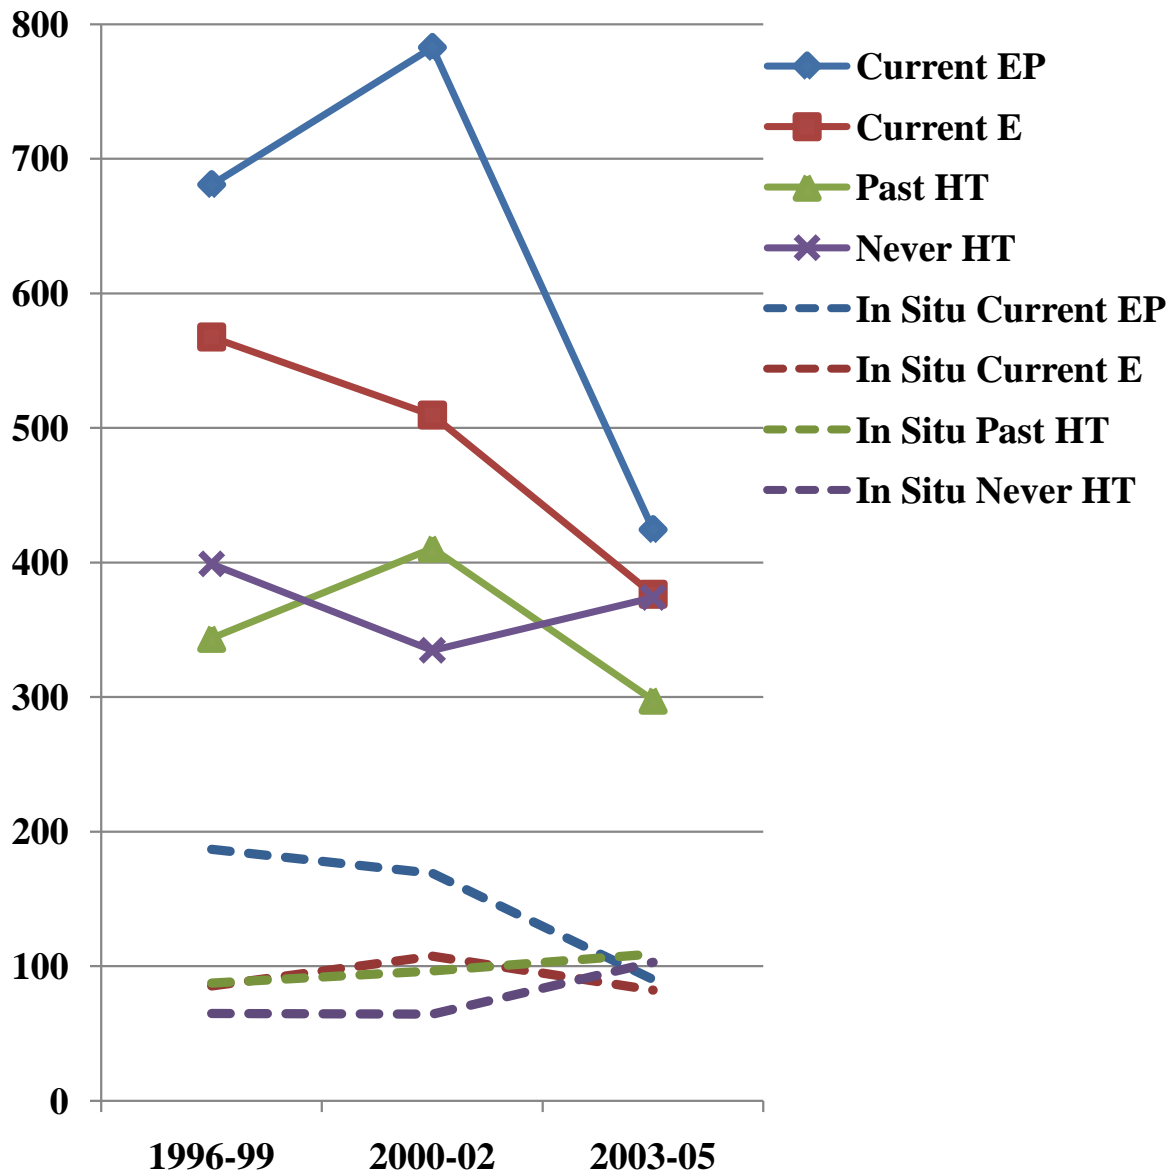

Supplement: MOESM2 [file 9701400]
